# Supplementary material for: Inhibition of orthotopic secondary hepatic carcinoma in mice by doxorubicin-loaded electrospun polylactide nanofibers
Source: Royal Society of Chemistry journal article supplement (doi:10.1039/c2tb00121g), 2012-11-01
Supplement: c2tb00121g.pdf [file c2tb00121g.pdf]

## Supplementary Data

### Inhibition of Orthotopic Secondary Hepatic Carcinoma in Mice by Doxorubicin-Loaded Electrospun Polylactide Nanofibers

Shi Liu<sup>a,b</sup>, Guangyuan Zhou<sup>a\*</sup>, Daxin Liu<sup>a,b</sup>, Zhigang Xie<sup>a</sup>, Yubin Huang<sup>a</sup>, Xue Wang<sup>c</sup>,  
Wenbin Wu<sup>d</sup>, Xiabin Jing<sup>a\*</sup>

<sup>a</sup> State Key Laboratory of Polymer Physics and Chemistry, Changchun Institute of Applied Chemistry, Chinese Academy of Sciences, Changchun 130022, People's Republic of China

<sup>b</sup> Graduate School of Chinese Academy of Sciences, Beijing 100049, People's Republic of China

<sup>c</sup> China-Japan union hospital of Jilin University, Changchun 130033, People's Republic of China

<sup>d</sup> The Second Hospital of Jilin University, Changchun 130041, People's Republic of China

**Table S1** Tumor size on the 7<sup>th</sup> day after EMT6 inoculation and the dosage of 6% Dox fibers used

| Mice No.                          |         | 1        | 2        | 3    | 4    | 5    | 6        |
|-----------------------------------|---------|----------|----------|------|------|------|----------|
| Tumor size (mm×mm)                | ventral | 9×2, 2×2 | 3×2, 3×2 | 5×4  | 5×2  | 8×3  | 7×5, 5×2 |
|                                   | dorsal  | 5×2      |          |      | 5×2  | 5×3  | 2×2      |
| Fiber-mat size (mm <sup>2</sup> ) |         | 196      | 168      | 144  | 200  | 200  | 250      |
| Drug content (mg)                 |         | 0.16     | 0.14     | 0.12 | 0.17 | 0.17 | 0.21     |

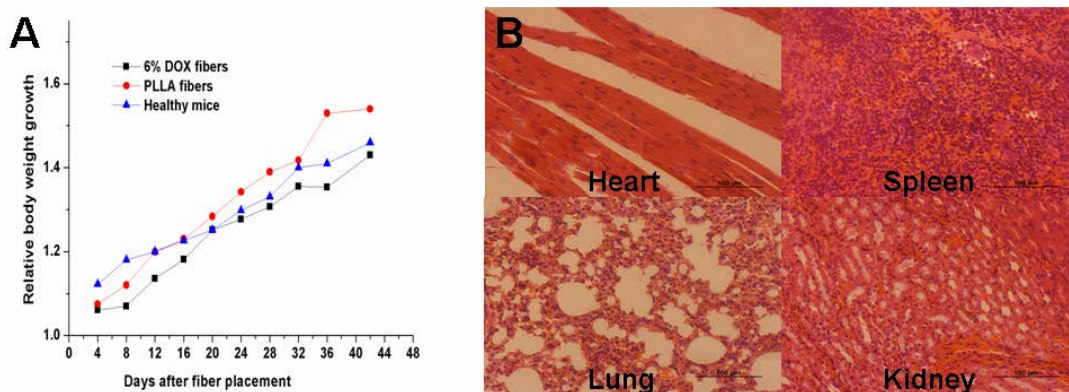

**Fig S1.** (A) Relative body weight changes as a function of time in healthy KM mice and in those treated with 6% Dox fibers and PLLA fibers. (B) Histological examination of the heart, spleen, lung and kidneys of mice on the 42<sup>nd</sup> day after 6% Dox fibers placement (bar = 100 μm).

\* Correspondence to: Xiabin Jing, State Key Laboratory of Polymer Physics and Chemistry, Changchun Institute of Applied Chemistry, Chinese Academy of Sciences, Changchun 130022, People's Republic of China. E-mail: gyzhou@ciac.jl.cn (Zhou G); [xbjing@ciac.jl.cn](mailto:xbjing@ciac.jl.cn) (Jing X)
